# Supplementary material for: Characterization of the Conformational Fluctuations in the Josephin Domain of Ataxin-3
Source: PubMed Central journal article supplement (PMC4269769; doi:10.1016/j.bpj.2014.10.008), 2014-12-16
Supplement: mmc1.pdf [file mmc1.pdf]

# The role of conformational fluctuations in the recognition of the Josephin domain of ataxin-3 with ubiquitin

Domenico Sanfelice<sup>1‡</sup>, Alfonso De Simone<sup>2</sup>, Andrea Cavalli<sup>3,4</sup>, Serena Faggiano<sup>1</sup>, Michele Vendruscolo<sup>4</sup>, Annalisa Pastore<sup>5\*</sup>

<sup>1</sup>MRC National Institute for Medical Research, London NW7 1AA, UK

<sup>2</sup>Division of Molecular Biosciences, Imperial College London, London SW7 2AZ, UK

<sup>3</sup>Institute for Research in Biomedicine, 6500 Bellinzona, Switzerland

<sup>4</sup>Department of Chemistry, University of Cambridge, Cambridge CB2 1EW, UK

<sup>5</sup>King's College London, London SE4, UK

## Supplementary Information

Table S1. Values of HN RDC in Phages at high salt

| <b>Phages 500mM NaCl</b> |      |        |
|--------------------------|------|--------|
| Seq.No.                  | Res. | RDC    |
| 2                        | GLU  | -3.96  |
| 3                        | SER  | 7.16   |
| 4                        | ILE  | -0.75  |
| 5                        | PHE  | 15.01  |
| 7                        | GLU  | 15.7   |
| 8                        | LYS  | 9.89   |
| 9                        | GLN  | 5.16   |
| 11                       | GLY  | 4.57   |
| 12                       | SER  | 9.47   |
| 13                       | LEU  | 11.82  |
| 15                       | ALA  | -5.48  |
| 17                       | HIS  | -2.53  |
| 18                       | CYS  | -9.32  |
| 20                       | ASN  | 3.53   |
| 21                       | ASN  | -14.07 |
| 23                       | LEU  | 0.18   |
| 25                       | GLY  | -9.17  |
| 27                       | TYR  | 7.80   |
| 28                       | PHE  | -4.73  |
| 29                       | SER  | -3.37  |
| 32                       | GLU  | -2.20  |
| 34                       | SER  | 7.71   |
| 35                       | SER  | -15.96 |
| 36                       | ILE  | -9.53  |
| 38                       | HIS  | -5.76  |
| 47                       | ARG  | -2.73  |
| 51                       | GLY  | 2.02   |
| 53                       | VAL  | 1.50   |
| 54                       | THR  | 6.72   |

|     |     |        |
|-----|-----|--------|
| 55  | SER | -7.96  |
| 57  | ASP | 4.70   |
| 60  | THR | 4.13   |
| 62  | LEU | -0.06  |
| 64  | GLN | 1.99   |
| 66  | SER | -4.99  |
| 67  | GLY | 2.53   |
| 68  | ASN | -6.89  |
| 71  | ASP | -2.99  |
| 72  | SER | 6.17   |
| 79  | VAL | 1.88   |
| 80  | ILE | -3.02  |
| 81  | SER | -9.60  |
| 83  | ALA | -0.66  |
| 84  | LEU | -6.26  |
| 88  | GLY | -5.40  |
| 90  | GLU | -5.21  |
| 91  | LEU | -9.81  |
| 92  | ILE | -12.77 |
| 93  | LEU | -6.28  |
| 94  | PHE | 20.41  |
| 96  | SER | 0.68   |
| 98  | GLU | 1.85   |
| 99  | TYR | -2.15  |
| 100 | GLN | -8.92  |
| 102 | LEU | 13.39  |
| 103 | ARG | 0.02   |
| 105 | ASP | 0.04   |
| 107 | ILE | 17.65  |
| 108 | ASN | 0.49   |
| 110 | ARG | -12.53 |
| 111 | SER | 9.85   |
| 112 | PHE | 6.99   |
| 113 | ILE | 9.73   |
| 115 | ASN | 27.84  |
| 116 | TYR | 17.57  |
| 117 | LYS | 18.28  |
| 118 | GLU | 14.58  |
| 119 | HIS | 5.76   |
| 120 | TRP | 21.8   |
| 121 | PHE | 18.25  |
| 122 | THR | 29.84  |
| 123 | VAL | -1.00  |
| 124 | ARG | 4.30   |
| 126 | LEU | 0.61   |
| 127 | GLY | -2.56  |
| 128 | LYS | -2.19  |
| 129 | GLN | 8.99   |
| 130 | TRP | 6.26   |
| 131 | PHE | -2.38  |
| 132 | ASN | -7.89  |
| 133 | LEU | 3.62   |
| 135 | SER | -2.17  |
| 137 | LEU | 5.52   |
| 138 | THR | 7.05   |

|     |     |        |
|-----|-----|--------|
| 142 | LEU | 0.08   |
| 143 | ILE | 0.40   |
| 144 | SER | 0.54   |
| 145 | ASP | -13.86 |
| 146 | THR | -4.07  |
| 148 | LEU | -12.30 |
| 149 | ALA | -5.22  |
| 150 | LEU | -12.51 |
| 151 | PHE | -9.69  |
| 154 | GLN | -16.29 |
| 155 | LEU | -8.46  |
| 158 | GLU | -8.64  |
| 159 | GLY | 16.16  |
| 161 | SER | 24.14  |
| 162 | ILE | 17.00  |
| 163 | PHE | 14.95  |
| 164 | VAL | -3.09  |
| 165 | VAL | -13.15 |
| 166 | LYS | -10.59 |
| 167 | GLY | 4.09   |
| 168 | ASP | -3.41  |
| 169 | LEU | 8.27   |
| 171 | ASP | -1.42  |
| 172 | CYS | 12.17  |
| 173 | GLU | 10.48  |
| 174 | ALA | -6.73  |
| 175 | ASP | 3.95   |
| 176 | GLN | 11.01  |
| 177 | LEU | -1.25  |
| 181 | ILE | 0.89   |
| 182 | ARG | 4.34   |

Table S2. RDC collected in phages at low ionic strength.

| <b>Phages no salt</b> |      |       |
|-----------------------|------|-------|
| Seq.No.               | Res. | RDC   |
| 2                     | GLU  | 0.54  |
| 3                     | SER  | -0.03 |
| 4                     | ILE  | 0.15  |
| 5                     | PHE  | 0.01  |
| 7                     | GLU  | 0.57  |
| 8                     | LYS  | 1.13  |
| 9                     | GLN  | 4.22  |
| 10                    | GLU  | -1.8  |
| 11                    | GLY  | 0.56  |
| 12                    | SER  | 0.28  |
| 13                    | LEU  | -0.76 |
| 15                    | ALA  | -0.59 |
| 17                    | HIS  | -0.43 |
| 19                    | LEU  | 11.96 |
| 21                    | ASN  | 1.25  |

|     |     |       |
|-----|-----|-------|
| 23  | LEU | -0.97 |
| 25  | GLY | -0.11 |
| 27  | TYR | -0.52 |
| 28  | PHE | 0.08  |
| 34  | SER | 0.23  |
| 35  | SER | 2.74  |
| 36  | ILE | -0.45 |
| 38  | HIS | 0.04  |
| 46  | MET | -2.39 |
| 51  | GLY | 0.19  |
| 52  | GLY | 9.3   |
| 53  | VAL | 0.25  |
| 54  | THR | -0.06 |
| 55  | SER | -5.9  |
| 56  | GLU | 1.03  |
| 57  | ASP | -2.65 |
| 59  | ARG | -0.08 |
| 60  | THR | 0.08  |
| 62  | LEU | -0.35 |
| 64  | GLN | 0.75  |
| 66  | SER | -0.76 |
| 67  | GLY | -2.14 |
| 68  | ASN | -1.83 |
| 71  | ASP | 0.27  |
| 72  | SER | 1.3   |
| 79  | VAL | -1.32 |
| 80  | ILE | -0.31 |
| 81  | SER | -0.78 |
| 83  | ALA | 0.05  |
| 86  | VAL | -2.02 |
| 90  | GLU | 0.77  |
| 91  | LEU | 1.08  |
| 93  | LEU | -0.02 |
| 96  | SER | -1.48 |
| 98  | GLU | 1.29  |
| 99  | TYR | -0.62 |
| 100 | GLN | 4.41  |
| 102 | LEU | -0.85 |
| 105 | ASP | -0.49 |
| 107 | ILE | 0.13  |
| 110 | ARG | -0.36 |
| 111 | SER | -0.19 |
| 112 | PHE | 0.71  |
| 113 | ILE | 0.2   |
| 115 | ASN | 1.27  |
| 116 | TYR | 0.96  |
| 117 | LYS | 0.62  |
| 118 | GLU | -0.43 |
| 119 | HIS | 0.48  |
| 120 | TRP | 1.64  |
| 121 | PHE | -0.64 |
| 122 | THR | 0.32  |
| 123 | VAL | 0.83  |
| 124 | ARG | 1     |
| 126 | LEU | -0.21 |

|     |     |       |
|-----|-----|-------|
| 128 | LYS | -0.38 |
| 130 | TRP | 1.09  |
| 132 | ASN | -0.89 |
| 133 | LEU | -1.08 |
| 135 | SER | 8.68  |
| 136 | LEU | -3.09 |
| 138 | THR | -0.06 |
| 139 | GLY | 0.2   |
| 142 | LEU | -0.06 |
| 143 | ILE | -0.43 |
| 145 | ASP | -0.27 |
| 146 | THR | 0.03  |
| 148 | LEU | 0.24  |
| 149 | ALA | -0.14 |
| 150 | LEU | 0.23  |
| 151 | PHE | -1.79 |
| 154 | GLN | -0.27 |
| 155 | LEU | -1.34 |
| 158 | GLU | -0.73 |
| 159 | GLY | -0.03 |
| 161 | SER | 0.36  |
| 162 | ILE | 0.44  |
| 163 | PHE | 0.42  |
| 164 | VAL | 0.08  |
| 165 | VAL | 0.03  |
| 166 | LYS | -0.05 |
| 167 | GLY | -0.06 |
| 168 | ASP | -0.69 |
| 169 | LEU | -0.29 |
| 171 | ASP | -0.84 |
| 172 | CYS | 0     |
| 173 | GLU | 0.23  |
| 174 | ALA | -0.83 |
| 175 | ASP | -2.95 |
| 176 | GLN | -0.5  |
| 177 | LEU | 0.17  |
| 181 | ILE | -1.46 |
| 182 | ARG | -0.08 |

Table S3. RDC collected in gels

| Gels    |      |      |
|---------|------|------|
| Seq.No. | Res. | RDC  |
| 4       | ILE  | 8.5  |
| 7       | GLU  | -2.1 |
| 11      | GLY  | 6.2  |
| 24      | GLN  | 2.3  |
| 25      | GLY  | -3.7 |
| 38      | HIS  | -0.7 |
| 51      | GLY  | 2.3  |

|     |     |       |
|-----|-----|-------|
| 54  | THR | 5.1   |
| 60  | THR | -1.4  |
| 67  | GLY | 10    |
| 72  | SER | 4.6   |
| 79  | VAL | 8.6   |
| 93  | ALA | -0.3  |
| 94  | LEU | -1.7  |
| 111 | SER | -14.3 |
| 112 | PHE | 1     |
| 116 | PHE | -1.2  |
| 118 | GLU | 2.2   |
| 121 | PHE | 4.1   |
| 123 | VAL | -5.43 |
| 124 | ARG | 2.2   |
| 126 | LEU | 6.2   |
| 127 | GLY | 6.6   |
| 131 | PHE | 2.1   |
| 132 | ASN | 0.3   |
| 138 | THR | 8.1   |
| 139 | LEU | 7.7   |
| 142 | LEU | -1    |
| 143 | ILE | 2.1   |
| 145 | ASP | -4.3  |
| 149 | ALA | -4.2  |
| 150 | LEU | 1.2   |
| 159 | GLY | -2.4  |
| 161 | SER | 0.2   |
| 163 | PHE | -7    |
| 164 | VAL | -3.6  |
| 165 | VAL | 5.3   |
| 167 | GLY | -4.8  |
| 169 | LEU | -7    |

Table S4. RDC collected in doped bicelles.

| <b>doped Bicelles</b> |      |       |
|-----------------------|------|-------|
| Seq.No.               | Res. | RDC   |
| 2                     | GLU  | -0.29 |
| 3                     | SER  | 0.17  |
| 4                     | ILE  | -0.24 |
| 5                     | PHE  | -5.50 |
| 8                     | LYS  | -0.38 |
| 9                     | GLN  | 2.38  |
| 10                    | GLU  | -0.24 |
| 11                    | GLY  | -2.56 |
| 13                    | LEU  | -0.79 |
| 15                    | ALA  | 0.50  |
| 17                    | HIS  | 0.03  |
| 19                    | LEU  | -0.64 |
| 21                    | ASN  | 0.13  |

|     |     |       |
|-----|-----|-------|
| 23  | LEU | -7.32 |
| 25  | GLY | 0.27  |
| 27  | TYR | -0.39 |
| 28  | PHE | -0.94 |
| 34  | SER | -0.23 |
| 35  | SER | 0.70  |
| 36  | ILE | 0.87  |
| 38  | HIS | -2.29 |
| 46  | MET | -2.07 |
| 51  | GLY | -0.53 |
| 53  | VAL | -1.21 |
| 54  | THR | -2.10 |
| 55  | SER | -4.83 |
| 56  | GLU | 2.29  |
| 59  | ARG | -1.92 |
| 60  | THR | 0.18  |
| 64  | GLN | -0.29 |
| 66  | SER | -1.18 |
| 67  | GLY | 2.62  |
| 68  | ASN | 1.07  |
| 72  | SER | 0.63  |
| 79  | VAL | 0.25  |
| 80  | ILE | -0.29 |
| 81  | SER | -0.28 |
| 83  | ALA | -0.03 |
| 86  | VAL | 0.62  |
| 90  | GLU | 0.50  |
| 91  | LEU | 0.04  |
| 93  | LEU | 0.07  |
| 96  | SER | -1.16 |
| 98  | GLU | 1.35  |
| 99  | TYR | 0.07  |
| 100 | GLN | -0.23 |
| 102 | LEU | -0.31 |
| 105 | ASP | -0.33 |
| 107 | ILE | -2.14 |
| 110 | ARG | -1.22 |
| 111 | SER | -0.15 |
| 112 | PHE | -0.26 |
| 113 | ILE | -0.99 |
| 115 | ASN | 0.38  |
| 116 | TYR | 0.70  |
| 117 | LYS | 0.42  |
| 118 | GLU | 0.84  |
| 119 | HIS | 3.12  |
| 120 | TRP | 0.02  |
| 121 | PHE | -0.67 |
| 122 | THR | -0.09 |
| 123 | VAL | 0.95  |
| 124 | ARG | 0.23  |
| 126 | LEU | 0.15  |
| 128 | LYS | -0.20 |
| 130 | TRP | 0.01  |
| 132 | ASN | -0.26 |
| 135 | SER | 5.53  |

|     |     |       |
|-----|-----|-------|
| 136 | LEU | -1.04 |
| 138 | THR | -0.17 |
| 139 | GLY | 0.18  |
| 142 | LEU | -0.02 |
| 143 | ILE | 0.46  |
| 145 | ASP | 0.06  |
| 146 | THR | -0.50 |
| 148 | LEU | 0.28  |
| 149 | ALA | 0.10  |
| 150 | LEU | 0.21  |
| 151 | PHE | 0.22  |
| 154 | GLN | -0.41 |
| 155 | LEU | -0.63 |
| 158 | GLU | -1.06 |
| 159 | GLY | -0.45 |
| 161 | SER | -0.08 |
| 162 | ILE | -0.23 |
| 163 | PHE | -0.4  |
| 164 | VAL | -0.07 |
| 165 | VAL | 0.11  |
| 166 | LYS | -0.17 |
| 167 | GLY | -0.27 |
| 168 | ASP | -0.01 |
| 169 | LEU | -1.50 |
| 171 | ASP | 0.14  |
| 172 | CYS | 0.15  |
| 173 | GLU | 0.27  |
| 175 | ASP | 3.95  |
| 176 | GLN | -5.28 |
| 177 | LEU | -3.33 |
| 181 | ILE | 0.17  |
| 182 | ARG | -0.08 |
